# Supplementary material
Source: PubMed Central journal article supplement (PMC4406941)
Supplement: 12192_2014_563_MOESM1_ESM.pdf [file 12192_2014_563_MOESM1_ESM.pdf]

| Species                | Accession number |                |                |                |
|------------------------|------------------|----------------|----------------|----------------|
|                        | HSF1             | HSF2           | HSF4           | HSF5           |
| <i>Bos taurus</i>      | NP_001070277.1   | NP_001076874.1 | NP_001178131.1 | XP_003583578.1 |
| <i>Capra hircus</i>    | AFN69446.1       | XP_004011206.1 | XP_005692180.1 | XP_852469.1    |
| <i>Canis lupus</i>     | XP_857779.1      | XP_005615766.1 | XP_005620672.1 | XP_005693243.1 |
| <i>Sus scrofa</i>      | XP_005655367.1   | XP_005659284.1 | XP_003126987.1 | XP_003131696.1 |
| <i>Pongo abelli</i>    | XP_002819601.1   | XP_002817354.1 | XP_002826567.1 | XP_002827389.1 |
| <i>Papio anubis</i>    | XP_003903315.1   | XP_003898289.1 | XP_003917065.1 |                |
| <i>Pan troglodytes</i> | NP_001266850.1   | XP_003311472.1 | XP_001161258.1 | XP_511908.2    |
| <i>Homo sapiens</i>    | NP_005517.1      | EAW48174.1     | BAA84582.1     | AAI15386.1     |
| <i>Mus musculus</i>    | XP_006520536.1   | XP_006512627.1 | AAF80398.1     | NP_001038992.1 |
