# Supplementary material
Source: PubMed Central journal article supplement (PMC4406941)
Supplement: 12192_2014_563_MOESM3_ESM.pdf [file 12192_2014_563_MOESM3_ESM.pdf]

a

```

                Exon-9                                Exon-
HSF1TV1  AGAAGTGCCTCAGCGTCGCCTGCCTAGACAA----- 31
HSF1TV2  AGAAGTGCCTCAGCGTCGCCTGCCTAGACAAATTGGCTCGCACTCCAAGATGTCTGGGG 60
          *****
HSF1TV1  -----GACCG 36
HSF1TV2  TCGCCCGCCTCTTCCCCTGCCCTCCCCCTTCTGCATGGCCGAGTCCAGCCAGG GACCG 120
          *****

                Exon-10
HSF1TV1  AGCTCAGCGACCACTTGGACGCCATGGACTCCAACCTGGACAACCTGCAGACCATGCTGA 96
HSF1TV2  AGCTCAGCGACCACTTGGACGCCATGGACTCCAACCTGGACAACCTGCAGACCATGCTGA 180
          *****

                Exon-11
HSF1TV1  CAAGCCATGGCTTCAGCGTGGACACCAGCACCCCTGCTGGATCTGTTCAGCCCCTCGGTTA 156
HSF1TV2  CAAGCCATGGCTTCAGCGTGGACACCAGCACCCCTGCTGGATCTGTTCAGCCCCTCGGTTA 240
          *****

                Exon-12
HSF1TV1  CGGTGCCCGACATGAGCCTGCCCGACCTGGACAGCAGCCTGGCCA GCATCCAGGAGCTCC 216
HSF1TV2  CGGTGCCCGACATGAGCCTGCCCGACCTGGACAGCAGCCTGGCCA GCATCCAGGAGCTCC 300
          *****

HSF1TV1  TCTCTCCCATGAGCCCCCAGACCTCTGGAGGCAGAGAAAAGCAGCCCAGACTCAG 273
HSF1TV2  TCTCTCCCATGAGCCCCCAGACCTCTGGAGGCAGAGAAAAGCAGCCCAGACTCAG 357
          *****

```

b

```

                Exon-10
HSF2TV1  GATTGCAGTTTAGAGGACTTCCAAGCCATGCTGTCAGGAAGACAGTTTAGCATAGACCCA 60
HSF2TV2  GATTGCAGTTTAGAGGACTTCCAAGCCATGCTGTCAGGAAGACAGTTTAGCATAGACCCA 60
          *****

                Exon-11
HSF2TV1  GACCTCCTTGTGTGATCTTTTCACTAGTTCTGTGCAGATGAATCCCACAGATTACATCAAT 120
HSF2TV2  GACCTCCTTGTGTGAT----- 75
          *****

                Exon-12
HSF2TV1  AATACAAAATCTGAGAATAAAGGATCAGAAACCAAGAACAAGTAGTTCAGCCAGTTTCA 180
HSF2TV2  -----TCTGAGAATAAAGGATTAGAAACCAAGAACAATGTAGTTCAGCCAGTTTCA 126
          *****

HSF2TV1  GAAGAGGG 188
HSF2TV2  GAAGAGGG 134

```
