# Supplementary material
Source: PubMed Central journal article supplement (PMC4406941)
Supplement: 12192_2014_563_MOESM7_ESM.pdf [file 12192_2014_563_MOESM7_ESM.pdf]

| Motif | Width | Best possible match   |
|-------|-------|-----------------------|
| 1     | 20    | YFKHNNMASFVRQLNMYGFR  |
| 2     | 20    | WTLVEDPHTDHFICWSPNGN  |
| 3     | 20    | FQHPCFKRGQEQLLENIKRK  |
| 4     | 20    | WREVATLRQKHAQQQKVINK  |
| 5     | 15    | FHVLDQGRFAKEILP       |
| 6     | 20    | EGRKSKPKTGKQLIHYTAFP  |
| 7     | 20    | MDCNLDDFQTMLTGHGFSID  |
| 8     | 20    | QFIITLVQNNRIVGVKRRKP  |
| 9     | 20    | MKGKQESMESRLREMKHENE  |
| 10    | 20    | RPEDNKIRQEDLTKIITDVQ  |
| 11    | 11    | PSNVPAFLWKL           |
| 12    | 9     | KVVHIEQGG             |
| 13    | 20    | NLFQHIVKEPADNHHHKVPH  |
| 14    | 20    | AHPMPKYGRQYSLEHIHGPG  |
| 15    | 20    | GRMEPLTPAEAPEACLFYAC  |
| 16    | 17    | DGIYYDVGDDYADDPNI     |
| 17    | 19    | TPEDPTTMMDSILRDNINT   |
| 18    | 20    | NCSQYPDIVIVEDDNEDEYA  |
| 19    | 20    | AVMSSGPPIIIDITELAPSSL |
| 20    | 8     | VKPERDGP              |
| 21    | 14    | YPAPSPAYSGSSLY        |
| 22    | 8     | NTNGAQKK              |
| 23    | 15    | ENKGLKETKNNVVQPV      |
| 24    | 20    | LAFLEKPEASPPQQGRATGA  |
| 25    | 17    | TSTLLDLFSPSVTVPDM     |
| 26    | 11    | RTEGLKSRERI           |
| 27    | 10    | VIPETNEDVI            |
| 28    | 11    | MDLPVGPAAAG           |
