# Supplementary material
Source: PubMed Central journal article supplement (PMC4406941)

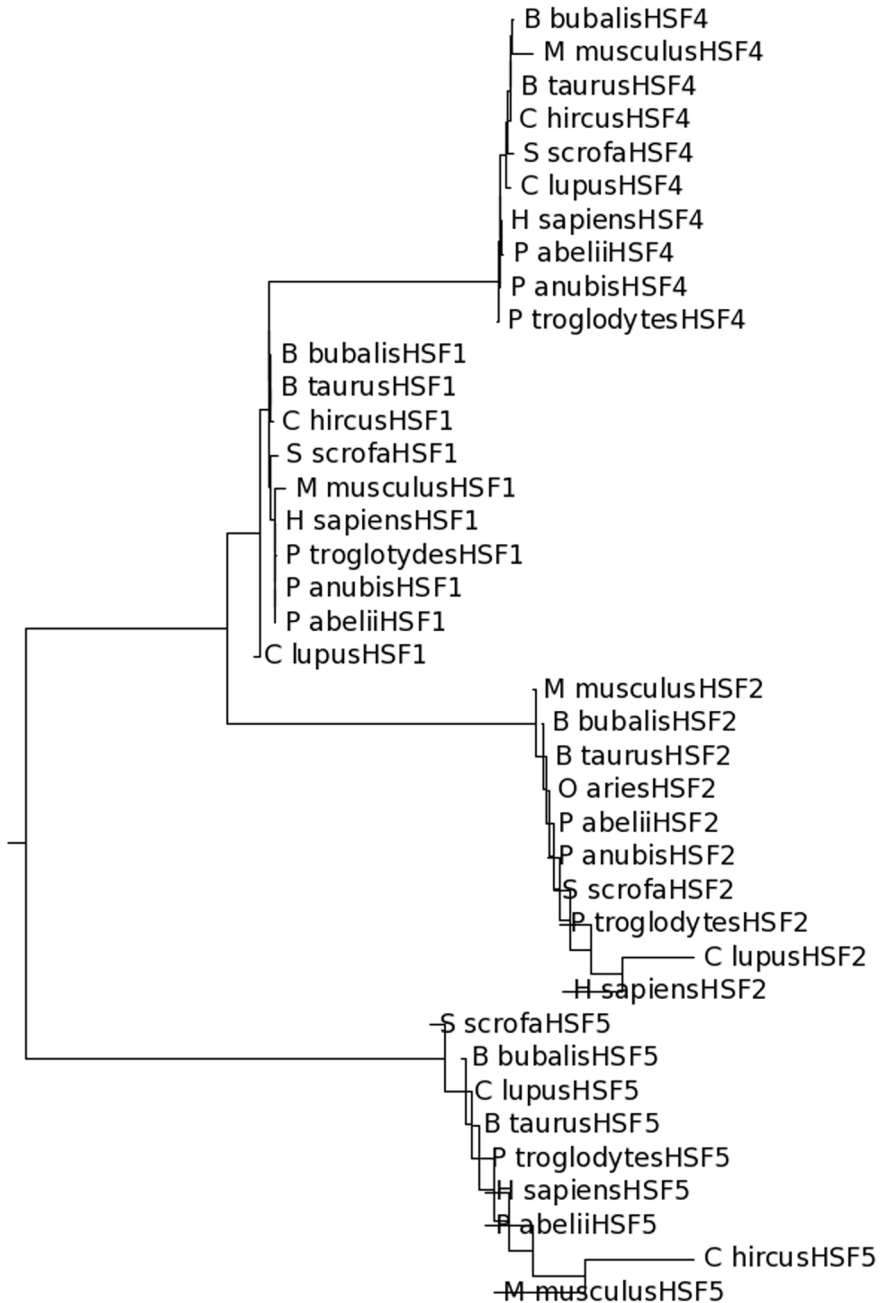

Supplement: 12192_2014_563_MOESM2_ESM.pdf [file 12192_2014_563_MOESM2_ESM.pdf]

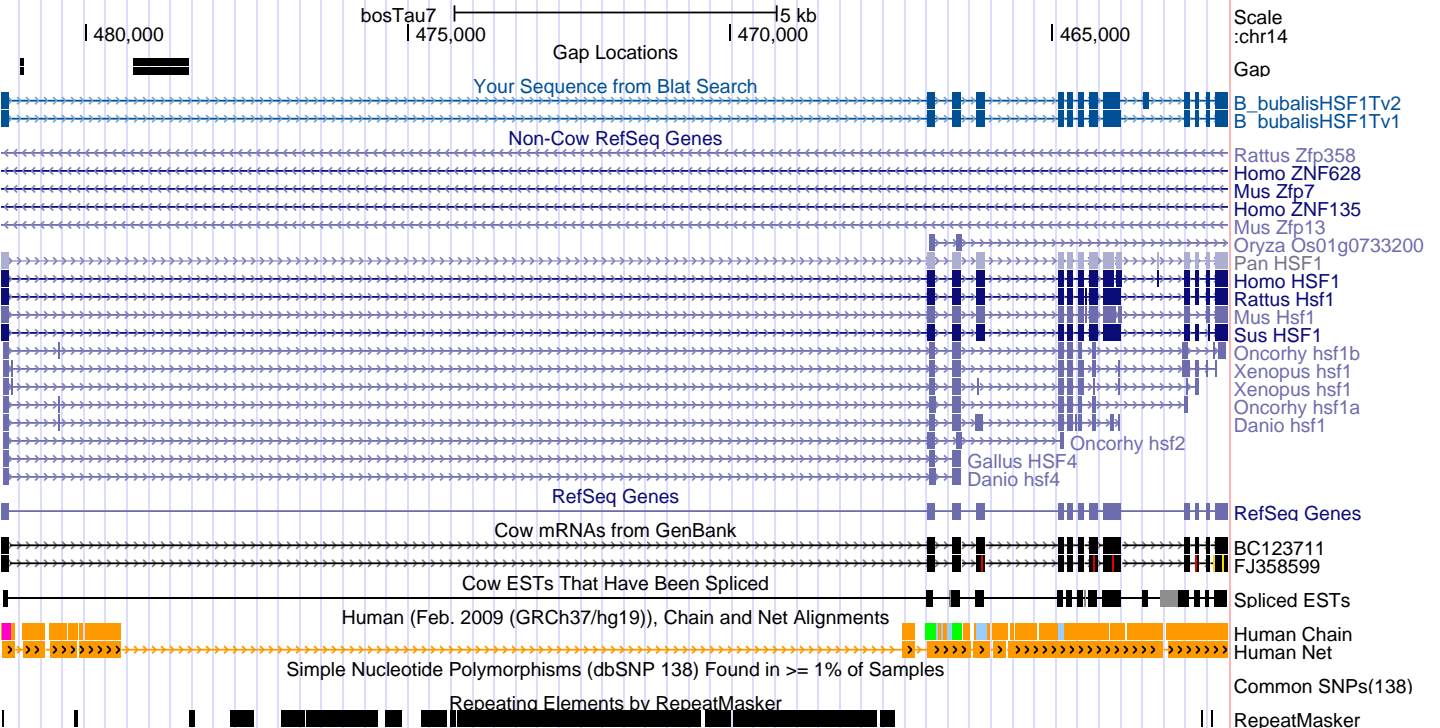

Supplement: 12192_2014_563_MOESM4_ESM.pdf [file 12192_2014_563_MOESM4_ESM.pdf]

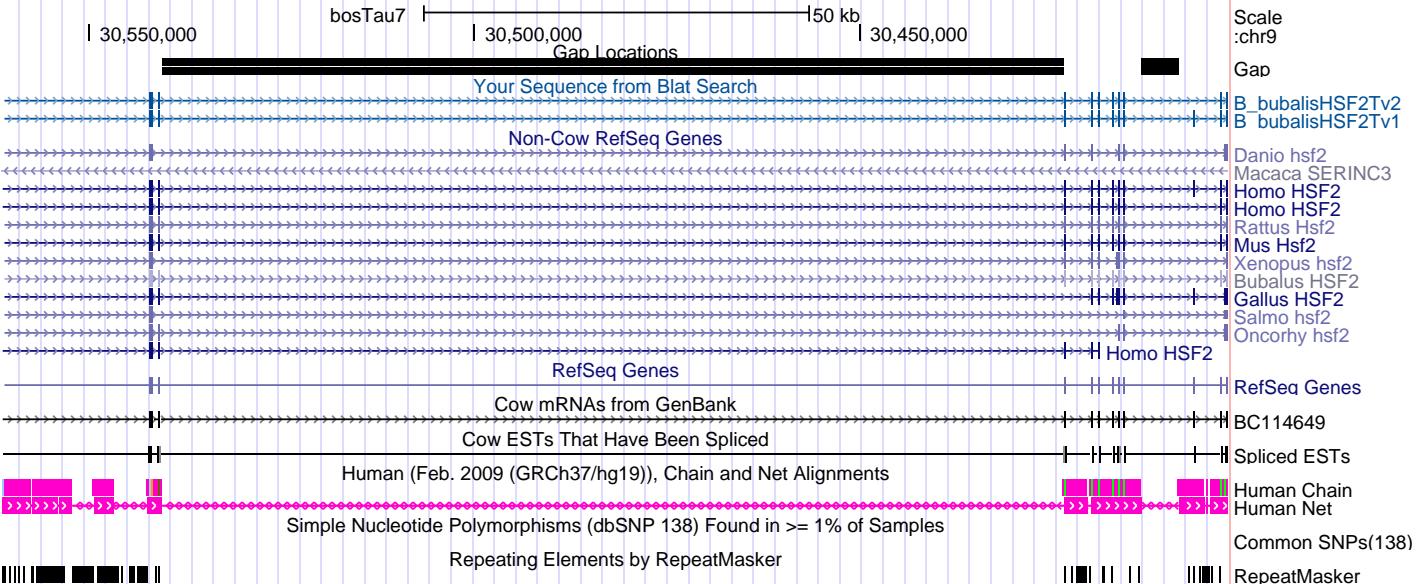

Supplement: 12192_2014_563_MOESM5_ESM.pdf [file 12192_2014_563_MOESM5_ESM.pdf]

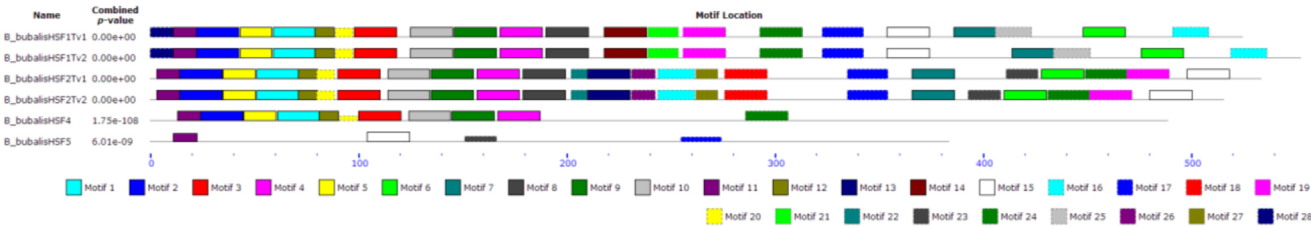

Supplement: 12192_2014_563_MOESM6_ESM.pdf [file 12192_2014_563_MOESM6_ESM.pdf]
